# Supplementary material for: Saccharomyces paradoxus K66 Killer System Evidences Expanded Assortment of Helper and Satellite Viruses
Source: MDPI journal article supplement (doi:10.3390/v10100564), 2018-10-16
Supplement: s1 [file s1]

# **Supplementary Materials: *Saccharomyces paradoxus* K66 killer system evidences expanded assortment of helper and satellite viruses**

Iglė Vepškaitė-Monstavičė, Juliana Lukša, Aleksandras Konovalovas, Dovilė Ežerskytė, Ramunė Stanevičienė, Živilė Strazdaitė-Žielienė, Saulius Serva and Elena Servienė

**A**

```

Sp AML-15-66 16 AATGGAtttttttGTTTTGGCAGGAGCATGAGAGCTTTTACTGGGCAAGAAGACAAGAGA 75
Sp CBS:5829 60 AATGGATTTTTTGTGTTTGGCAGGAGCATGAGAGCTTTTACTGGGCAAGAAGACAAGAGA 119

Sp AML-15-66 76 TGGAGAGTCCAGTCGGGCTGCGCTTAAGTGC GCGGTCTTGCTTGGCTTGTAAAGTTTCTT 135
Sp CBS:5829 120 TGGAGAGTCCAGTCGGGCTGCGCTTAAGTGC GCGGTCTTGCTTGGCTTGTAAAGTTTCTT 179

Sp AML-15-66 136 TCTTGCTATTCCAAACGGTGAGAGATTTCTGTGCTATTGTTATAGGACAATTAACCGT 195
Sp CBS:5829 180 TCTTGCTATTCCAAACGGTGAGAGATTTCTGTGCTATTGTTATAGGACAATTAACCGT 239

Sp AML-15-66 196 TTCAATACAACACACTGTGGAGTTTTCATATCTTTGCAACTTTTTCTTTGGGCATTTCGAG 255
Sp CBS:5829 240 TTCAATACAACACACTGTGGAGTTTTCATATCTTTGCAACTTTTTCTTTGGGCATTTCGAG 299

Sp AML-15-66 256 CAATCGAGGCCAGAGGTAACAAACACAAACAATTTATTTATTCAATTAATTTTGTCA 315
Sp CBS:5829 300 CAATCGAGGCCAGAGGTAACAAACACAAACAATTTATTTATTCAATTAATTTTGTCA 359

Sp AML-15-66 316 AAAACAAGAATTTTCGTAAC TGGAATTTTAAAAATATTA AAAACTTTCAACACGGATC 375
Sp CBS:5829 360 AAAACAAGAATTTTCGTAAC TGGAATTTTAAAAATATTA AAAACTTTCAACACGGATC 419

Sp AML-15-66 376 TCTTGGTTCTCGCATCGATGAAGAACGCAGCGAAATGCGATACGTAATGTGAATTGCAGA 435
Sp CBS:5829 420 TCTTGGTTCTCGCATCGATGAAGAACGCAGCGAAATGCGATACGTAATGTGAATTGCAGA 479

Sp AML-15-66 436 ATTCGTGAATCATCGAATCTTTGAACGCACATTGCGCCCTTGGTATTCCAGGGGGCAT 495
Sp CBS:5829 480 ATTCGTGAATCATCGAATCTTTGAACGCACATTGCGCCCTTGGTATTCCAGGGGGCAT 539

Sp AML-15-66 496 GCCTGTTTGAGCGTCATTTCTTCTCAAACATTCTGTTTGGTAGTGAGTGATACTCTTTG 555
Sp CBS:5829 540 GCCTGTTTGAGCGTCATTTCTTCTCAAACATTCTGTTTGGTAGTGAGTGATACTCTTTG 599

Sp AML-15-66 556 GAGTTAACTTGAAATGCTGGCCTTTTCATTGGATGtttttttCCAAAGAGAGGTTTCT 615
Sp CBS:5829 600 GAGTTAACTTGAAATGCTGGCCTTTTCATTGGATGTTTTTTTCCAAAGAGAGGTTTCT 659

Sp AML-15-66 616 CTGCGTGCTTGAGGTATAATGCAAGTACGGTCGTTTTAGGTTTTACCAACTGCGGCTAAT 675
Sp CBS:5829 660 CTGCGTGCTTGAGGTATAATGCAAGTACGGTCGTTTTAGGTTTTACCAACTGCGGCTAAT 719

Sp AML-15-66 676 CTTTTTTGTA CTGAGCGTATTGGAACGTTATCGATAAGAAGAGAGCGCTAGGCGAACAA 735
Sp CBS:5829 720 CTTTTTTGTA CTGAGCGTATTGGAACGTTATCGATAAGAAGAGAGCGCTAGGCGAACAA 779

Sp AML-15-66 736 TGTTCCTTAAAGTTTGACCTCAAATCAGGTAGGAGTACCCGCTGAACCTTAAGCATATCA 793
Sp CBS:5829 780 TGTTCCTTAAAGTTTGACCTCAAATCAGGTAGGAGTACCCGCTGAACCTTAAGCATATCA 837

```

**B**

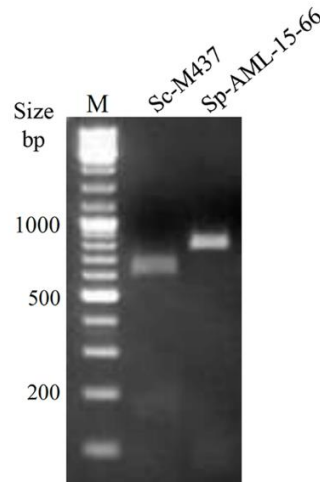

**Figure S1.** Identification of *S. paradoxus* AML-15-66 strain. A. Similarity of AML-15-66 to *Saccharomyces paradoxus* culture CBS:5829 based on sequences of internal transcribed spacer 1 and 2 including 5.8S ribosomal RNA gene. B. RFLP-PCR profiles of ITS regions of *S. paradoxus* AML-15-66 and *S. cerevisiae* M437 yeasts. FspBI-digested PCR products loaded on 2% agarose gel. M: molecular weight (kb) marker GeneRuler DNA Ladder Mix (Thermo Fisher).

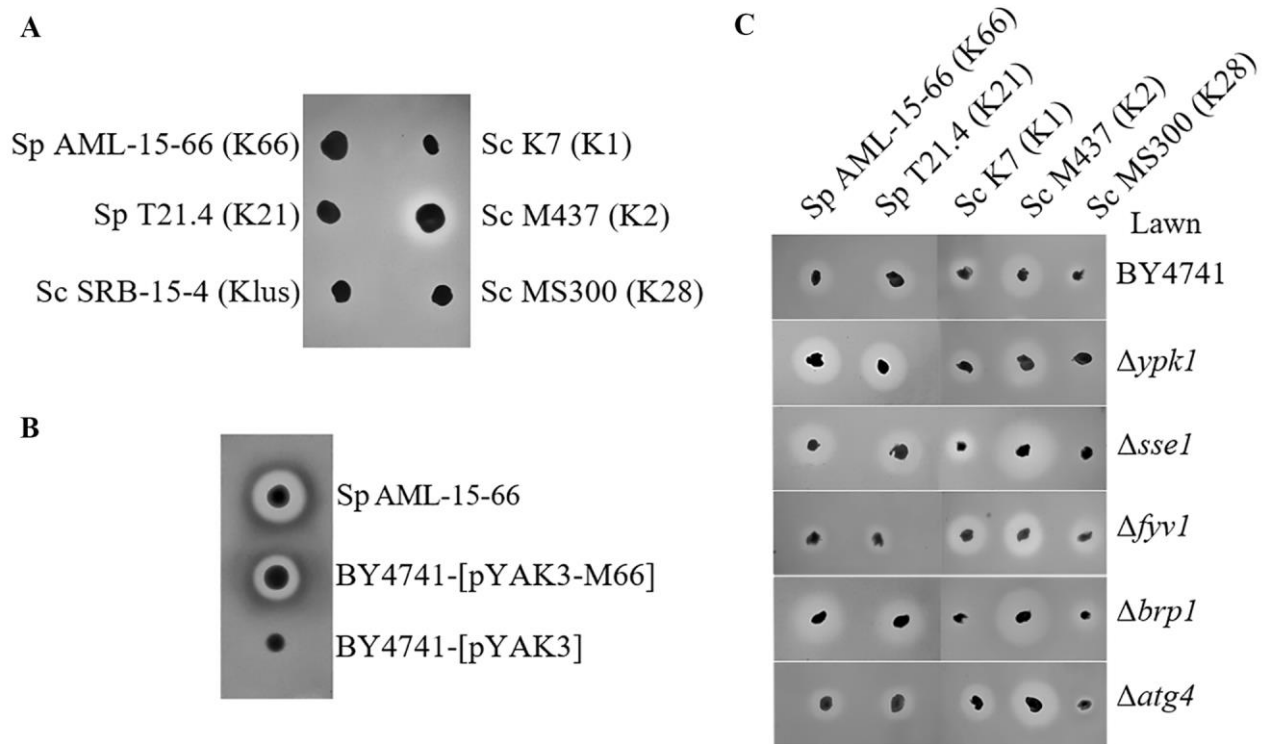

**Figure S2.** Characterization of killing and immunity features of K66 toxin-producing *S. paradoxus* strain. A. Susceptibility of *S. paradoxus* AML-15-66 strain to the *S. cerevisiae* killer toxins. *S. cerevisiae* strain M437 producing K2 type viral toxin inhibits growth of *S. paradoxus* AML-15-66 cells seeded into MBA agar. Other toxin producing strains did not demonstrate lysis zones on overlay of AML-15-66 cells. B. Killing phenotype of *S. paradoxus* K66 toxin producing *wt* strain and *S. cerevisiae* transformant BY4741-[pYAK3-M66] featuring expressed K66 coding sequence. Plate is seeded with a lawn of the *S. cerevisiae* strain BY4741. C. Representative examples of yeast mutant susceptibility to different killer toxins. The assay was performed by depositing toxin producing cells on the surface of an MBA plate (pH 4.8) inoculated with a mutant strain to test.

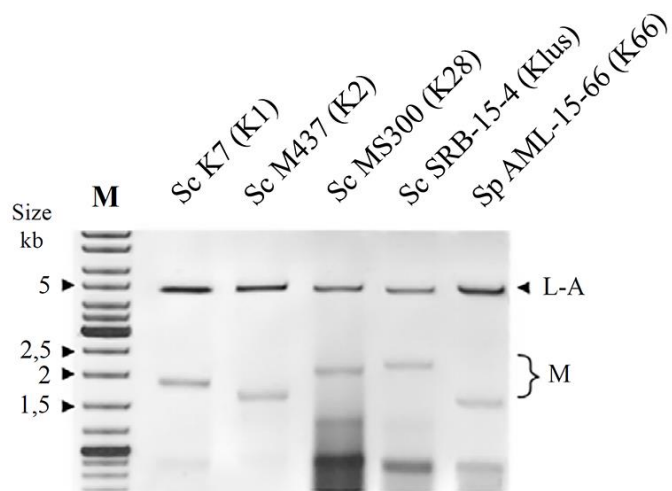

**Figure S3.** Electrophoretic analysis of dsRNAs extracted from different killer yeast. L-A and M on the right marks type of dsRNA. Source strain and killer type indicated above the picture, M denotes molecular weight marker GeneRuler DNA Ladder Mix (Thermo Fisher Scientific).

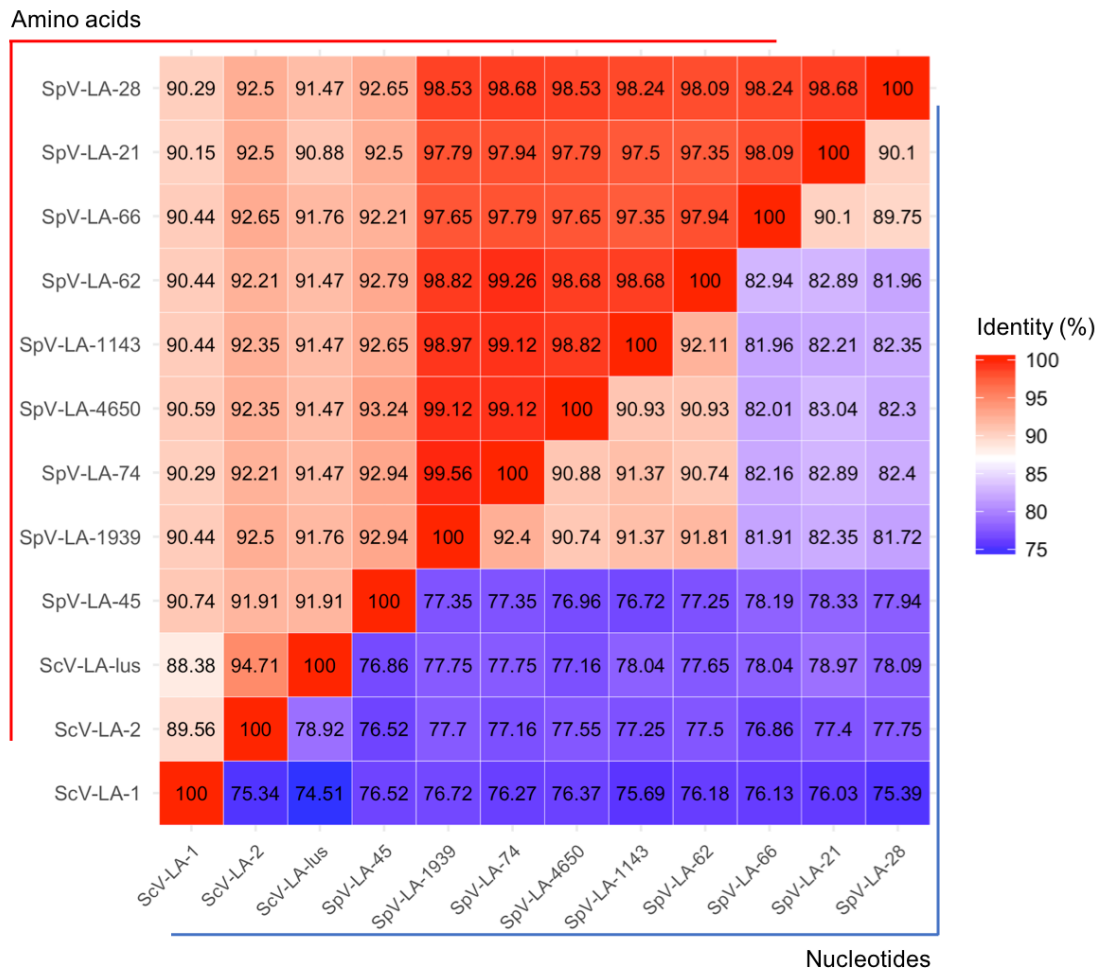

**Figure S4.** The similarities of *S. cerevisiae* and *S. paradoxus* dsRNA L-A virus-encoded Gag proteins. Identity at nucleotide level is represented in the lower right triangle, amino acid level – in the upper left triangle, framed by corresponding blue and red lines.



|         |                                                                              |     |     |     |     |     |
|---------|------------------------------------------------------------------------------|-----|-----|-----|-----|-----|
|         | 1                                                                            | 10  | 20  | 30  | 40  | 50  |
| SpV-M66 | . . G AAAATGTCTAAGCTGTATAA T ACCTC CAGGGAAGTTACATGGCGTAG C ATTTTTTCA         |     |     |     |     |     |
| SpV-M21 | GAA AAAATGTCTAAGCTGTATAA C ACCTC TAGGGAAGTTACATGGCGTAG T ATTTTTTCA           |     |     |     |     |     |
|         | 60                                                                           | 70  | 80  | 90  | 100 | 110 |
| SpV-M66 | CTTGCC T TTAAGATCATGCTGGTAATGTTCTGTGT C TTAGCTGTATTAAC A CTGTTAGT A          |     |     |     |     |     |
| SpV-M21 | CTTGCC C TTAAGATCATGCTGGTAATGTTCTGTGT T TTAGCTGTATTAAC G CTGTTAGT G          |     |     |     |     |     |
|         | 120                                                                          | 130 | 140 | 150 | 160 | 170 |
| SpV-M66 | AGCCG G CTTT TAGGCACATCACAA T T G TGGATGT A GAACACTTGAGTA T GCTGCATAAA       |     |     |     |     |     |
| SpV-M21 | AGCCG A CTTT TAGGCACATCACAA C C A TGGATGT G GAACACTTGAGTA G GCTGCATAAA       |     |     |     |     |     |
|         | 180                                                                          | 190 | 200 | 210 | 220 | 230 |
| SpV-M66 | CGAGC C AGATGGACATGGGTTCAAGG T GC GACTTATGCAGGGCTG C T TTAGCAGCAGGT          |     |     |     |     |     |
| SpV-M21 | CGAGC T AGATGGACATGGGTTCAAGG C GC AACTTATGCAGGGCTG T T A TTAGCAGCAGGT        |     |     |     |     |     |
|         | 240                                                                          | 250 | 260 | 270 | 280 | 290 |
| SpV-M66 | GCTCTCATAGCTCCGTC G TGGTCAGCAGCAAT C TGC CTGGCGACGG T GAA A GACTA T TGT T    |     |     |     |     |     |
| SpV-M21 | GCTCTCATAGCTCCGTC T TGGTCAGCAGCAAT A TGC T TGGCGACGG C GAA G GACTA C TGC C   |     |     |     |     |     |
|         | 300                                                                          | 310 | 320 | 330 | 340 | 350 |
| SpV-M66 | GC G CCACTAG T TAATGCTATTCTTAGCAGATTGTTGTCAGC G TAGCCGGAGGGAT G GCC          |     |     |     |     |     |
| SpV-M21 | GC A CCACTAG C TAATGCTATTCTTAGCAGATTGTTGTCAGC A TAGCCGGAGGGAT A GCC          |     |     |     |     |     |
|         | 360                                                                          | 370 | 380 | 390 | 400 | 410 |
| SpV-M66 | TGGCGTACTAGCGGTGTGG A T A TACAC C A GCGTGC G CTGCAATCATCGCTG G TTCT G GGC    |     |     |     |     |     |
| SpV-M21 | TGGCGTACTAGCGGTGTGG G T G TACAC G A A CGTGC A CTGCAATCATCGCTG A TTCT C GGC   |     |     |     |     |     |
|         | 420                                                                          | 430 | 440 | 450 | 460 | 470 |
| SpV-M66 | TC T CT CAATCTAACACTCAACGC C GACTT TAACAG T AGTCA A CTAGCGGC G GTTGATACC     |     |     |     |     |     |
| SpV-M21 | TC C CT TAATCTAACACTCAACGC T GACTT CAACAG C AGTCA G CTAGCGGC T GTTGATACC     |     |     |     |     |     |
|         | 480                                                                          | 490 | 500 | 510 | 520 | 530 |
| SpV-M66 | CACCC T CATT TGGTCTCG C TGGATGC A TGGACAGTGGGGCCA A C G GAC T TAC A CAGATTA  |     |     |     |     |     |
| SpV-M21 | CACCC G CATT TGGTCTCG T TGGATGC G TGGACAGTGGGGCCA G C A GAC C TAC G CAGATTA  |     |     |     |     |     |
|         | 540                                                                          | 550 | 560 | 570 | 580 | 590 |
| SpV-M66 | GGTAAACGTGA C G A GGATACAGG C A G TTCTGT C AA C AACGGCACTTA C TTA TTCTTCAC A |     |     |     |     |     |
| SpV-M21 | GGTAAACGTGA T G G GGATACAGG TA A TTCTGT T AA T AACGGCACTTA T TT TTCTTCAC G   |     |     |     |     |     |
|         | 600                                                                          | 610 | 620 | 630 | 640 | 650 |
| SpV-M66 | TCCGAATATGG T ACTCATACTGC G CACATG C CAGGTGATGATGT T GGTACTCTAGTAGA T        |     |     |     |     |     |
| SpV-M21 | TCCGAATATGG C ACTCATACTGC T CACATG T CAGGTGATGATGT C GGTACTCTAGTAGA C        |     |     |     |     |     |
|         | 660                                                                          | 670 | 680 | 690 | 700 | 710 |
| SpV-M66 | TTTGT A TT G AACGC A G TTCCAGACGAGCCTAACAT C AATA C T ACAATTAATT T T ACTAAG  |     |     |     |     |     |
| SpV-M21 | TTTGT G TT A AACGC G A TTCCAGACGAGCCTAACAT T AATA G C ACAATTAATT C T GCTAAG  |     |     |     |     |     |
|         | 720                                                                          | 730 | 740 | 750 | 760 | 770 |
| SpV-M66 | CGGAGTCA G CAATTCCGAGTATCATGGGTGTCATATATATGGGACGAAGCCAACCATGAT               |     |     |     |     |     |
| SpV-M21 | CGGAGTCA A CAATTCCGAGTATCATGGGTGTCATATATATGGGACGAAGCCAACCATGAT               |     |     |     |     |     |
|         | 780                                                                          | 790 | 800 | 810 | 820 | 830 |
| SpV-M66 | CTGGATACCGAGTGGTATAATGAAGA G GGTGGTAGCTT T GACTCTCAGTTAGAAGAA A GT           |     |     |     |     |     |
| SpV-M21 | CTGGATACCGAGTGGTATAATGAAGA A GGTGGTAGCTT C GACTCTCAGTTAGAAGAA G GT           |     |     |     |     |     |
|         | 840                                                                          | 850 | 860 | 870 | 880 | 890 |
| SpV-M66 | TTG G CGCAAGCAATAA TTGATATACCTGACTGGAA A TACTG C ATTGCACC A GAAGTCAGT        |     |     |     |     |     |
| SpV-M21 | TTG A CGCAAGCAATA G TTGATATACCTGACTGGAA G TACTG T ATTGCACC T GAAGTCAGT       |     |     |     |     |     |
|         | 900                                                                          | 910 | 920 | 930 | 940 | 950 |
| SpV-M66 | AAGGGCGAGGCAA TATCTTATGACGACATACCCGGCAGCA T G ACGGAAATGG T AATGCG            |     |     |     |     |     |
| SpV-M21 | AAGGGCGAGGCAA TATCTTATGACGACATACCCGGCAGCA A A ACGGAAATGG C AATGCG            |     |     |     |     |     |



|         |                                                               |      |      |      |      |      |
|---------|---------------------------------------------------------------|------|------|------|------|------|
|         | 960                                                           | 970  | 980  | 990  | 1000 | 1010 |
| SpV-M66 | TTACACGGGAGGTTTACTTCAATACCTACGGTGGTTTGGATAATTATTGTAACTCTGCA   |      |      |      |      |      |
| SpV-M21 | TTACACGGAGAGTCTACTTCAATACCTACGGTGGTTTGGATAGTTATTGCAATCTCTGCA  |      |      |      |      |      |
|         | 1020                                                          | 1030 | 1040 | 1050 | 1060 | 1070 |
| SpV-M66 | CATGACGGTGCAGATCGTTGGCGATAGGTATTAGACTACCTGGTTAGGGGCTTCNCCCT   |      |      |      |      |      |
| SpV-M21 | CATGACGGTGCAGACCGTTGGCGTAGGTATCACACACCTGGTCTAGAGGAATTCATTT    |      |      |      |      |      |
|         | 1080                                                          | 1090 | 1100 | 1110 | 1120 | 1130 |
| SpV-M66 | GCGCATAAAGTNTACTNTNTAATACNTNTGACGGTTTAAGATAATTTAGAATTAAATTTG  |      |      |      |      |      |
| SpV-M21 | GCGCATCAAGTCTGTGATTGAATACCTCTGCCGCTTAAGATAAGTCAGAATTAGATTTA   |      |      |      |      |      |
|         | 1140                                                          | 1150 | 1160 | 1170 | 1180 | 1190 |
| SpV-M66 | ACAAATAAATAGTNTAAATTA.....ATNTNTAAAAAAAAAAAAAAAAAAAAAAAAA     |      |      |      |      |      |
| SpV-M21 | ACAAATAAATAGTATAGGTTAACGTAGTATTTATAAAAAAAAAAAAAAAAAAAAAAAAAA  |      |      |      |      |      |
|         | 1200                                                          | 1210 |      |      |      |      |
| SpV-M66 | AACAAAAACAACAAAAACAAAAACAA.....                               |      |      |      |      |      |
| SpV-M21 | AAAATAAAAAAATAAAAAAATAAAAAAAGAGAGAGAAAGAAAAAGA                |      |      |      |      |      |
|         |                                                               | 1220 | 1230 | 1240 | 1250 |      |
| SpV-M66 | .....AACACAAACATAAACAAAGATGTGTAACTGAATATTATTACTTGT            |      |      |      |      |      |
| SpV-M21 | AAAGAAAGAAAGAGAAACAACTAAATATAAACAAAGATGTAGTAATGATATTATTACTTGT |      |      |      |      |      |
|         | 1260                                                          | 1270 | 1280 | 1290 | 1300 | 1310 |
| SpV-M66 | GTTGTGCTGTACACATGCCTCTAAACAGGTAGTATGGTCTGTACTGTTATCGTCAGTATG  |      |      |      |      |      |
| SpV-M21 | GTTGTGCTGTACATATGCCTCTAAACAGGTAGTACGGTCTGTACTATTACCGTCAGTACG  |      |      |      |      |      |
|         | 1320                                                          | 1330 | 1340 | 1350 | 1360 | 1370 |
| SpV-M66 | CTAGATGTTTTCATCAGCGTACACTGACTGTTAGGGACGACCGCACTGCCTGTAATTCAG  |      |      |      |      |      |
| SpV-M21 | CTAGATGTTTTCATCAGCGTATTCAACTGTCTGGGACAGACCGCACTGCTTGTAAATCAAA |      |      |      |      |      |
|         | 1380                                                          | 1390 | 1400 | 1410 | 1420 | 1430 |
| SpV-M66 | TACGAATCACTGTTTGGCCTGACCGCCGTAGCATTGAGTACTGGGTAGCTGCTGTATTAC  |      |      |      |      |      |
| SpV-M21 | TACGAATCACTGTTTGGCCCAACCGTCAATAACATTGAGTACTGGATAGCTGCTGTGTAC  |      |      |      |      |      |
|         | 1440                                                          | 1450 | 1460 | 1470 | 1480 | 1490 |
| SpV-M66 | TAGAAAAGACAGGTGTTTCACCGTCTTGATATTGGTAAATTACACTGCTAGCAGGCATGGT |      |      |      |      |      |
| SpV-M21 | TAGAAAAGACAGGTGTTTCACCGTCTCATATCTGGTGGTTACACTGCTAGCAGGCATAGT  |      |      |      |      |      |
|         | 1500                                                          | 1510 | 1520 | 1530 | 1540 | 1550 |
| SpV-M66 | GAGCGTAAGCCGTGGCGAACCGACGGCAAACCATGATGGATTCAATTACCTATGCA      |      |      |      |      |      |
| SpV-M21 | AAGCGTAAGCCGTGGAGAACCGACGGCAAACCATGATGGATTCAATTACCTATGC.      |      |      |      |      |      |

Figure S5. Sequence alignment of SpV-M66 and SpV-M21 genomes.

## SpV-M66 (1553 bp)

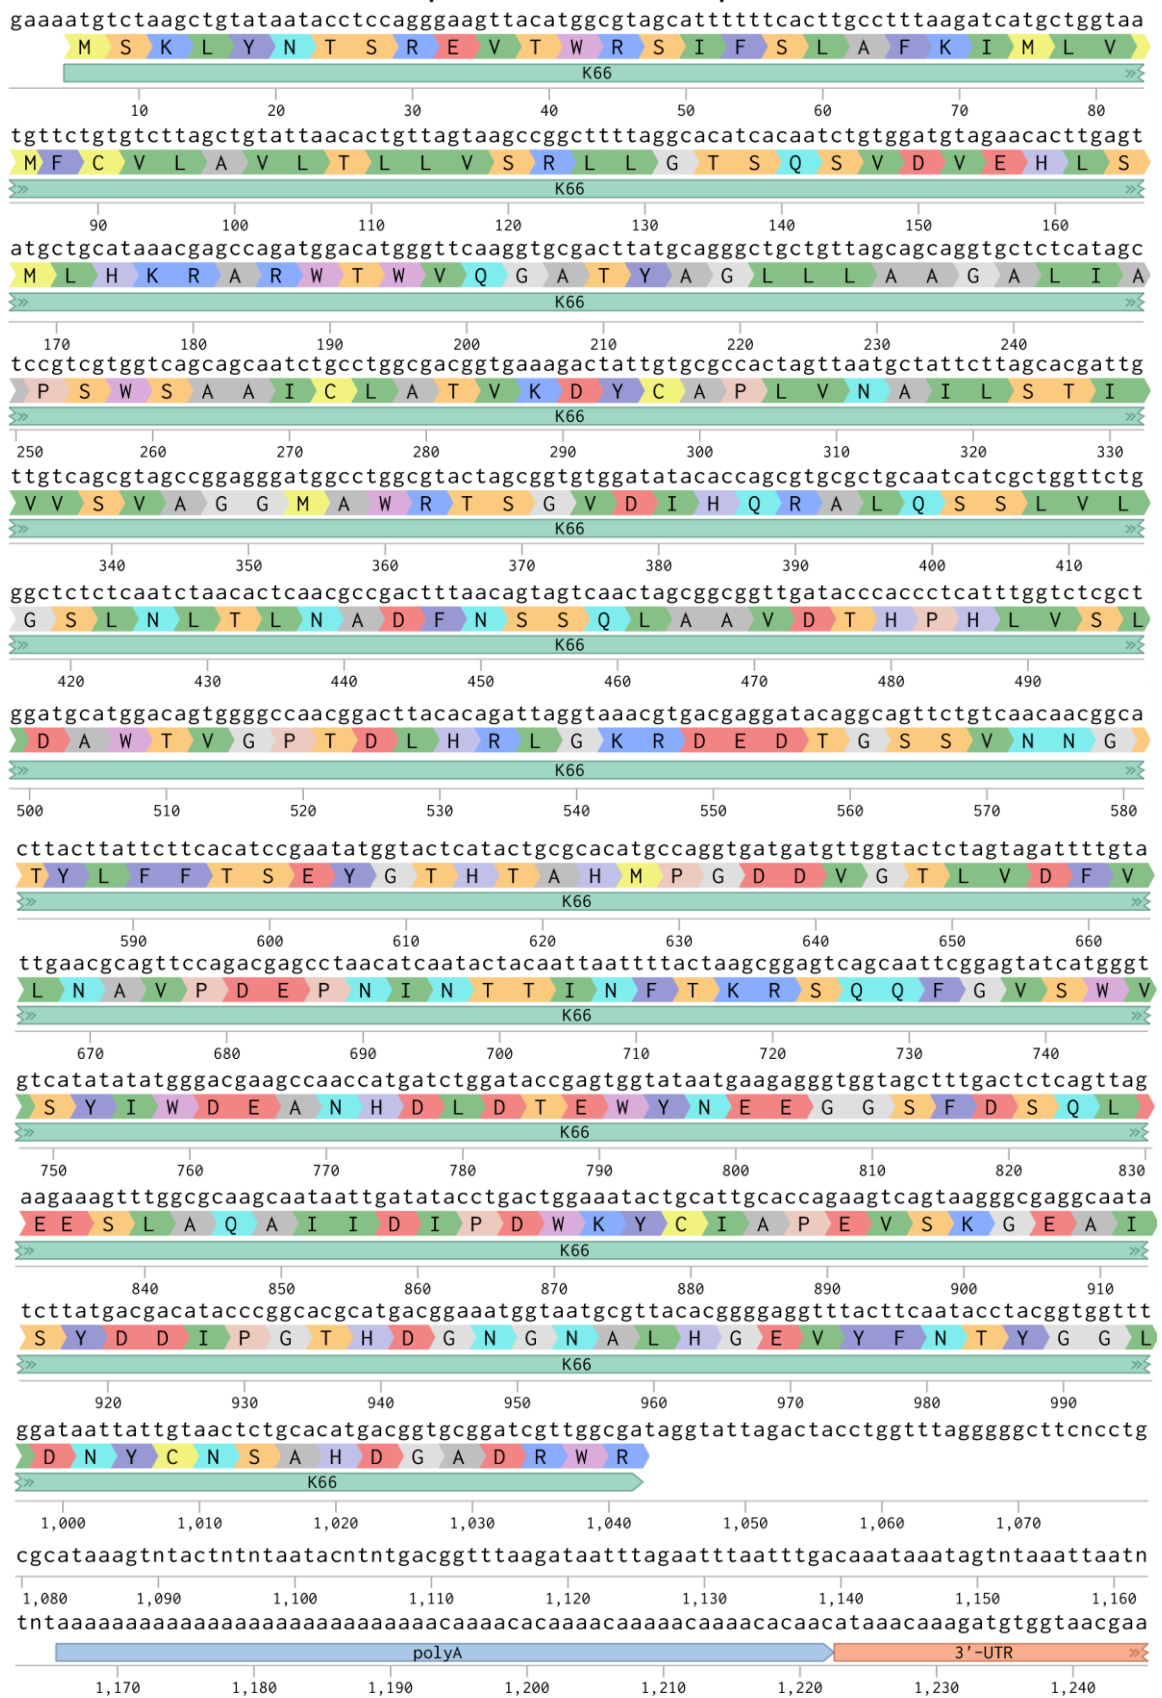



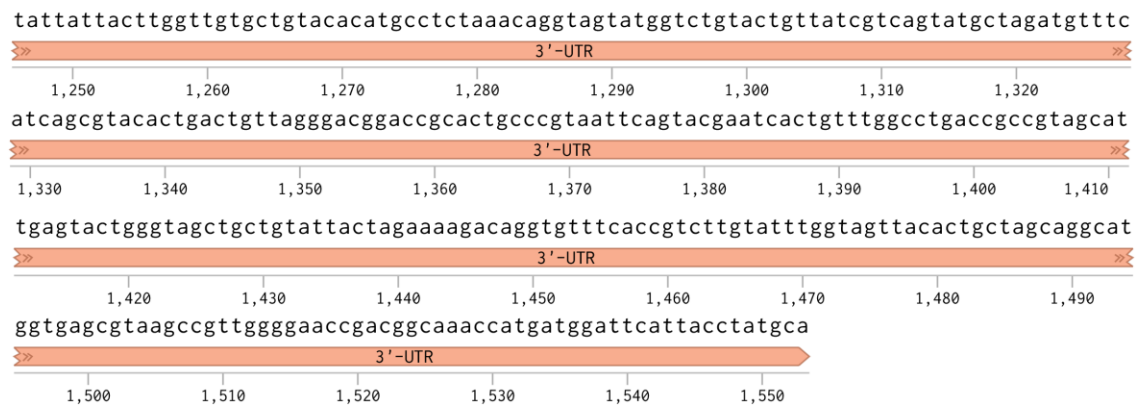

**Figure S6.** Nucleotide sequence of the SpV-M66 genome and amino acid sequence of the putative ORF of K66 toxin.
